# Supplementary material
Source: publisher site journal article supplement (https://www.kjim.org/upload/media/kjim-2018-133-suppl1.pdf)
Supplement: Supplementary file 1 [file kjim-2018-133-suppl1.pdf]

**Supplementary Table 1. Exclusion criteria**

|    |                                                                                                                                                                                                                                                                                                                                 |
|----|---------------------------------------------------------------------------------------------------------------------------------------------------------------------------------------------------------------------------------------------------------------------------------------------------------------------------------|
| 1  | Patients without established CHD or CHD risk equivalents                                                                                                                                                                                                                                                                        |
| 2  | LDL-C, 70 mg/dL at the screening visit in patients with a history of documented CVD                                                                                                                                                                                                                                             |
| 3  | LDL-C, 100 mg/dL at the screening visit in patients without history of documented CVD                                                                                                                                                                                                                                           |
| 4  | Not on a stable dose of lipid lowering therapy (including statin) for $\geq 4$ weeks before the screening visit or between screening and randomization visits                                                                                                                                                                   |
| 5  | Currently taking a statin that is not atorvastatin, rosuvastatin, or simvastatin                                                                                                                                                                                                                                                |
| 6  | Atorvastatin, rosuvastatin, or simvastatin is not taken daily or not taken at a registered dose                                                                                                                                                                                                                                 |
| 7  | Daily dose above atorvastatin 80 mg, rosuvastatin 20 mg, or simvastatin 40 mg                                                                                                                                                                                                                                                   |
| 8  | Use of fibrates, other than fenofibrate in the past 4 weeks before screening visit or between screening and randomization visits                                                                                                                                                                                                |
| 9  | Use of nutraceutical products or over-the-counter therapies that may affect lipids which have not been at a stable dose/amount for $\geq 4$ weeks before the screening visit or between screening and randomization visits                                                                                                      |
| 10 | Use of red yeast rice products within 4 weeks of the screening visit or between screening and randomization visits                                                                                                                                                                                                              |
| 11 | Patient who has received plasmapheresis treatment within 2 months before the screening visit or has plans to receive this during the study                                                                                                                                                                                      |
| 12 | History of a MI, unstable angina leading to hospitalization, CABG, PCI, uncontrolled cardiac arrhythmia, carotid surgery or stenting, stroke, transient ischemic attack, carotid revascularization, endovascular procedure, or surgical intervention for peripheral vascular disease within 3 months before the screening visit |
| 13 | Planned to undergo scheduled PCI or CABG, or carotid or peripheral revascularization, during the study                                                                                                                                                                                                                          |
| 14 | Systolic blood pressure (160 mmHg) or diastolic blood pressure (100 mmHg) at screening visit or randomization visit                                                                                                                                                                                                             |
| 15 | History of New York Heart Association Class III or IV heart failure within the past 12 months                                                                                                                                                                                                                                   |
| 16 | Known history of hemorrhagic stroke                                                                                                                                                                                                                                                                                             |
| 17 | Age, 18 years or legal age of majority at the screening visit, whichever is greater                                                                                                                                                                                                                                             |
| 18 | Patients not previously instructed on a cholesterol-lowering diet before the screening visit                                                                                                                                                                                                                                    |
| 19 | Newly diagnosed (within 3 months before randomization visit) or poorly controlled (HbA <sub>1c</sub> > 9% at the screening visit) diabetes                                                                                                                                                                                      |
| 20 | Presence of any clinically significant uncontrolled endocrine disease known to influence serum lipids or lipoproteins                                                                                                                                                                                                           |
| 21 | History of bariatric surgery within 12 months before the screening visit                                                                                                                                                                                                                                                        |
| 22 | Unstable weight defined by a variation > 5 kg within 2 months before the screening visit                                                                                                                                                                                                                                        |
| 23 | Known history of homozygous or heterozygous familial hypercholesterolemia                                                                                                                                                                                                                                                       |
| 24 | Known history of loss of function of PCSK9 (i.e., genetic mutation or sequence variation)                                                                                                                                                                                                                                       |
| 25 | Use of systemic corticosteroids, unless used as replacement therapy for pituitary/adrenal disease with a stable regimen for at least 6 weeks before randomization                                                                                                                                                               |
| 26 | Use of continuous estrogen or testosterone hormone replacement therapy unless the regimen has been stable in the past 6 weeks before the screening visit and no plans to change the regimen during the study                                                                                                                    |
| 27 | History of cancer within the past 5 years, except for adequately treated basal cell skin cancer, squamous cell skin cancer, or <i>in situ</i> cervical cancer                                                                                                                                                                   |
| 28 | Known history of a positive HIV test                                                                                                                                                                                                                                                                                            |
| 29 | Patient who has taken any investigational drugs other than the alirocumab training placebo kits within 1 month or 5 half-lives, whichever is longer                                                                                                                                                                             |
| 30 | Patient who has been previously treated with at least 1 dose of alirocumab or any other anti-PCSK9 monoclonal antibody in other clinical trials                                                                                                                                                                                 |
| 31 | Patient who withdraws consent during the screening period (patient who is not willing to continue or fails to return)                                                                                                                                                                                                           |

**Supplementary Table 1. Continued**

|    |                                                                                                                                                                                                                                                                                                                                                                                                                                                                                                                                                                                                                                                                                                                                                                                                                                                                                                                                                                                                                                                          |
|----|----------------------------------------------------------------------------------------------------------------------------------------------------------------------------------------------------------------------------------------------------------------------------------------------------------------------------------------------------------------------------------------------------------------------------------------------------------------------------------------------------------------------------------------------------------------------------------------------------------------------------------------------------------------------------------------------------------------------------------------------------------------------------------------------------------------------------------------------------------------------------------------------------------------------------------------------------------------------------------------------------------------------------------------------------------|
| 32 | <p>Conditions/situations such as:</p> <p>Any clinically significant abnormality identified at the time of screening that in the judgment of the investigator or any sub-investigator would preclude safe completion of the study or constrain endpoints assessment such as major systemic diseases or patients with a short life expectancy.</p> <p>Considered by the investigator or any sub-investigator as inappropriate for this study for any reason, e.g.,</p> <p>Deemed unable to meet specific protocol requirements, such as scheduled visits</p> <p>Deemed unable to administer or tolerate long-term injections as per the patient or the investigator</p> <p>Investigator or any sub-investigator, pharmacist, study coordinator, other study staff, or relative thereof directly involved in the conduct of the protocol, etc.</p> <p>Presence of any other conditions (e.g., geographic, social), actual or anticipated, that the investigator feels would restrict or limit the patient's participation for the duration of the study</p> |
| 33 | <p>Laboratory findings during the screening period:</p> <p>Positive test for hepatitis B surface antigen or hepatitis C antibody (confirmed by reflexive testing)</p> <p>Positive serum <math>\beta</math>-human chorionic gonadotropin or urine pregnancy test in women of childbearing potential</p> <p>Triglycerides &gt; 400 mg/dL (1 repeat laboratory is allowed)</p> <p>eGFR &lt; 30 mL/min/1.73 m<sup>2</sup></p> <p>ALT or AST &gt; 3 <math>\times</math> ULN (1 repeat laboratory is allowed)</p> <p>CPK &gt; 3 <math>\times</math> ULN (1 repeat laboratory is allowed)</p> <p>TSH &lt; lower limit of normal or &gt; ULN (1 repeat laboratory is allowed)</p>                                                                                                                                                                                                                                                                                                                                                                                |
| 34 | All contraindications to the background therapies or warning/precaution of use (when appropriate) as displayed in the respective National Product Labeling                                                                                                                                                                                                                                                                                                                                                                                                                                                                                                                                                                                                                                                                                                                                                                                                                                                                                               |
| 35 | Known hypersensitivity to monoclonal antibody or any component of the drug products                                                                                                                                                                                                                                                                                                                                                                                                                                                                                                                                                                                                                                                                                                                                                                                                                                                                                                                                                                      |
| 36 | Pregnant or breastfeeding women                                                                                                                                                                                                                                                                                                                                                                                                                                                                                                                                                                                                                                                                                                                                                                                                                                                                                                                                                                                                                          |
| 37 | Women of childbearing potential not protected by highly effective method(s) of birth control and/or who are unwilling or unable to be tested for pregnancy                                                                                                                                                                                                                                                                                                                                                                                                                                                                                                                                                                                                                                                                                                                                                                                                                                                                                               |

CHD, coronary heart disease; LDL-C, low density lipoprotein cholesterol; CVD, cardiovascular disease; MI, myocardial infarction; CABG, coronary artery bypass graft; PCI, percutaneous coronary intervention; HbA<sub>1c</sub>, glycated hemoglobin; PCSK9, proprotein convertase subtilisin/kexin type 9; HIV, human immunodeficiency virus; eGFR, estimated glomerular filtration rate; ALT, alanine aminotransferase; AST, aspartate transferase; ULN, upper limit of normal; CPK, creatine phosphokinase; TSH, thyroid stimulating hormone.
